# Efficacy of the BNT162b2 mRNA COVID-19 vaccine in a haemodialysis cohort

Luc Frantzen <sup>1</sup>, Guilhem Cavaille<sup>1</sup>, Sandrine Thibeaut<sup>2</sup> and Yohan El-Haik<sup>3</sup>

<sup>1</sup>Service de Néphrologie, Hôpital Saint Joseph Marseille, Marseille, France, <sup>2</sup>Laboratoire de Biologie Médicale, Hôpital Saint Joseph Marseille, Marseille, France and <sup>3</sup>Pharmacie, Centre de Dialyse DIAVERUM, Hôpital Saint Joseph Marseille, Marseille, France

Correspondence to: Luc Frantzen; E-mail: lfrantzen@mac.com

## INTRODUCTION

Nephrologists call for priority access to coronavirus disease 2019 (COVID-19) vaccination in patients receiving in-centre haemodialysis [1] for two main reasons: a very high risk of severe acute respiratory syndrome coronavirus 2 (SARS-CoV-2) infection compared with the general population (5–16 times more likely [2] because they travel to their dialysis centre three times a week and are surrounded by other patients and caregivers) and also a particular high mortality rate (close to 20%) when infected by SARS-CoV-2 [3].

Our team is taking care of 470 in-centre haemodialysis patients in Marseille and its surroundings, a region severely affected by COVID-19. As soon as vaccination was prioritized for our patients, we proceeded to a large-scale campaign as of 18 January 2021, when the first injections were administered.

Nevertheless, a major downside is vaccine hyporesponse among such immune-compromised patients, who often show disappointing seroconversion rates (e.g. a 44% rate following a double-dose vaccination schedule for hepatitis B [4]).

In this context and given the lack of data on COVID-19 vaccination in dialysis, we decided to evaluate the vaccine response of our patients by serology testing in order to optimize their future management.

## MATERIALS AND METHODS

We proposed the COVID-19 vaccination—two injections 3 weeks apart of the BNT162b2 mRNA COVID-19 vaccine—to all our in-centre haemodialysis patients. The exclusion criteria were a lack of consent or a SARS-CoV-2 infection less than 3 months ago. The patients were vaccinated in their dialysis centre (the majority during their dialysis session).

Vaccination efficacy was assessed 1 month after the second injection by quantifying antibodies directed against the Spike protein using the Elecsys<sup>®</sup> Anti SARS-CoV-2 S enzyme immunoassay (which presents a high correlation with neutralizing antibodies).

**Table 1. Patient characteristics and immune response after two doses of the BNT162b2 mRNA COVID-19 vaccine**

| Patient characteristics                            | Total          |
|----------------------------------------------------|----------------|
|                                                    | <i>n</i> = 244 |
| Age, mean (IQR), years <sup>a</sup>                | 71 (63–80)     |
| Male, <i>n</i> (%)                                 | 170 (70)       |
| Obesity (BMI >30 kg/m <sup>2</sup> ), <i>n</i> (%) | 55 (23)        |
| Comorbidity, <i>n</i> (%)                          |                |
| Diabetes mellitus                                  | 90 (37)        |
| Hypertension                                       | 212 (87)       |
| Heart disease                                      | 86 (35)        |
| Cancer/haemopathy <sup>b</sup>                     | 3 (1)          |
| Chronic obstructive pulmonary disease              | 16 (6)         |
| Immunosuppression therapy, <i>n</i>                | 1 <sup>c</sup> |
| Previous SARS-CoV-2 infection, <i>n</i> (%)        | 32 (13)        |
| Positive antibody response >15 U/mL, <i>n</i> (%)  | 221 (91)       |
| > 250 U/mL                                         | 142 (58)       |
| 200–249 U/mL                                       | 4 (2)          |
| 150–199 U/mL                                       | 8 (3)          |
| 100–149 U/mL                                       | 20 (8)         |
| 50–99 U/mL                                         | 24 (10)        |
| 15–49 U/mL                                         | 23 (9)         |
| Negative antibody response <15 U/mL, <i>n</i> (%)  | 23 (9)         |

<sup>a</sup>Interquartile range (IQR).

<sup>b</sup>With ongoing treatment.

<sup>c</sup>Pancreatic graft.

BMI, body mass index.

## RESULTS

As of early March, 70% of our cohort (326 patients) had received the two injections (3 weeks apart) of the BNT162b2 mRNA COVID-19 vaccine. Vaccine tolerability was excellent, with no serious adverse event in the overall cohort.

The first results, regarding 244 patients, show a very high response rate: 91% present a positive antibody titer (with a cut-off fixed at 15 U/mL for the Elecsys<sup>®</sup> Anti SARS-CoV-2 S test).

The baseline characteristics of the patients and their immune response are shown in Tables 1 and 2.

Older patients were less likely to present an antibody response. There was also no response to vaccination among all

**Table 2. Demographic and clinical characteristics of patients stratified by immune response**

|                                             | Antibody level        |                      | P-value          |
|---------------------------------------------|-----------------------|----------------------|------------------|
|                                             | >15 U/mL<br>(n = 221) | <15 U/mL<br>(n = 23) |                  |
| Age, median (IQR), years                    | 70 (63–79)            | 77 (72–85)           | <b>0.005</b>     |
| Male, n (%)                                 | 158 (71)              | 12 (52)              | 0.25             |
| Obesity (BMI >30 kg/m <sup>2</sup> ), n (%) | 51 (23)               | 4 (17)               | 0.53             |
| Comorbidity, n (%)                          |                       |                      |                  |
| Diabetes mellitus                           | 85 (38)               | 5 (22)               | 0.11             |
| Hypertension                                | 192 (87)              | 20 (87)              | 0.99             |
| Heart disease                               | 81 (37)               | 5 (22)               | 0.15             |
| Cancer/haemopathy                           | 0                     | 3 (13)               | <b>&lt;0.001</b> |
| Chronic obstructive pulmonary disease       | 15 (7)                | 1 (4)                | 0.65             |
| Immunosuppression therapy, n                | 0                     | 1                    | <b>0.002</b>     |
| Previous SARS-CoV-2 infection, n (%)        | 31 (14)               | 1 (4)                | 0.19             |

Descriptive statistics included the percentages for categorical variables and the median [interquartile range (IQR)] for continuous variables according to the distribution. Comparisons between the two groups according to the presence or absence of a significant antibody level for continuous variables were made using the Student's *t*-test or the Mann-Whitney test, according to the variable distribution. Comparisons between the two groups for categorical variables were made using the Pearson's chi-square test or Fisher's exact test. A P-value <0.05 was considered significant (shown in bold). The statistical analysis was conducted using R version 3.6.0 R Development Core Team (2019). BMI, body mass index.

the patients undergoing chemotherapy (3/3) or under immunosuppression (1/1).

## DISCUSSION

These results go far beyond what is usually seen with other vaccines in this hyporesponsive population, with a 91% antibody positivity rate, with 60% of the patients presenting an antibody level >200 U/mL correlating to maximal neutralizing capacity in the neutralization assays for the Elecsys<sup>®</sup> Anti SARS-CoV-2 S test.

However, some of our patients showed a rather weak response, and a recent study [5] reported lower antibody levels in dialysis patients compared with the general population. The consequences may be a lower vaccine efficacy and a shorter period of immunoprotection. It is therefore necessary to consider reinforced vaccination schedules.

Nevertheless, in parallel to these biological results, we have witnessed a spectacular decrease in new case occurrences as of mid-February (3 weeks after the first injections) in our dialysis centres.

This clinical and biological response to a mRNA COVID-19 vaccination among a highly vulnerable population is extremely promising. Studies to assess vaccine efficacy in this population in the real-world setting are needed.

## CONFLICT OF INTEREST STATEMENT

The authors declare that the results presented in this paper have not been published previously in whole or part. None of the authors presents a conflict of interest.

## REFERENCES

- Francis A, Baigent C, Ikizler T *et al*. The urgent need to vaccinate dialysis patients against severe acute respiratory syndrome coronavirus 2: a call to action. *Kidney Int* 2021; 99: 791–793
- De Meester J, De Bacquer D, Naesens M *et al*. Incidence, characteristics, and outcome of COVID-19 in adults on kidney replacement therapy: a region-wide registry study. *J Am Soc Nephrol* 2021; 32: 385–396
- Savino M, Casula A, Santhakumaran S *et al*. Sociodemographic features and mortality of individuals on haemodialysis treatment who test positive for SARS-CoV-2: a UK Renal Registry data analysis. *PLoS ONE* 2020; 15: e0241263
- Krueger KM, Ison MG, Ghossein C. Practical guide to vaccination in all stages of CKD, including patients treated by dialysis or kidney transplantation. *Am J Kidney Dis* 2020; 75: 417–425
- Grupper A, Sharon N, Finn T *et al*. Humoral response to the Pfizer BNT162b2 vaccine in patients undergoing maintenance hemodialysis. *Clin J Am Soc Nephrol* 2021; 16: doi: 10.2215/CJN.03500321 (online ahead of print)

Received: 19.4.2021; Editorial decision: 21.4.2021
